# Supplementary material for: Long-term outcomes of hospital survivors following an ICU stay: A multi-centre retrospective cohort study
Source: PLoS One. 2022 Mar 28;17(3):e0266038. doi: 10.1371/journal.pone.0266038 (PMC8959167; doi:10.1371/journal.pone.0266038)
Supplement: S2 Fig — Follow-up is only 3-years post hospital discharge to allow comparison between each year period. Three-year period groups were created to facilitate simple comparisons. (DOCX) [file pone.0266038.s002.docx]

| **S2 Fig. Survival curves limited to 3-years post discharge stratified by year group (solid lines) compared to the matched standard Australian population (dotted lines).** |
| --- |
| 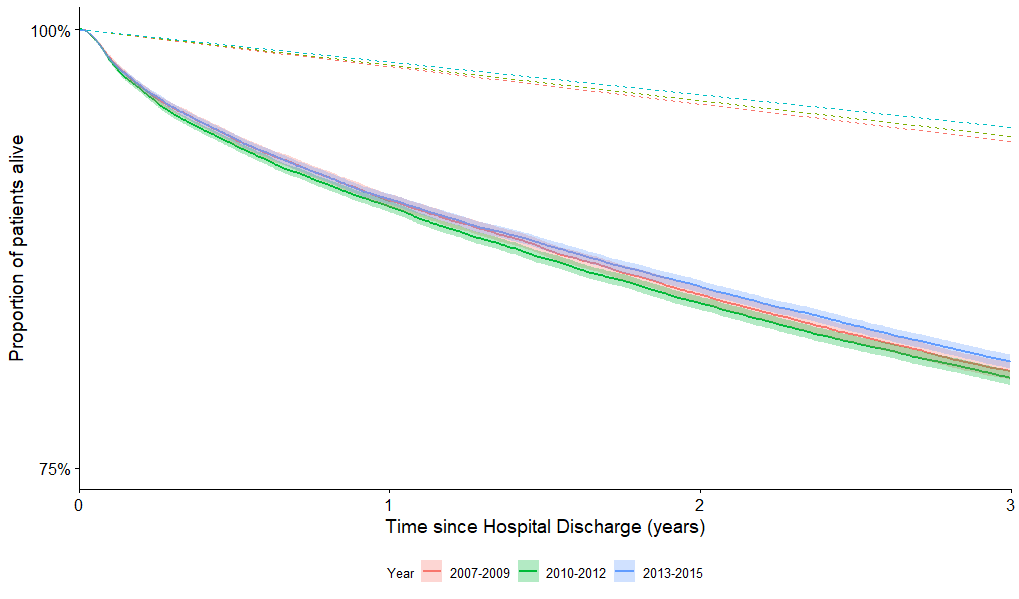   | **Year period** | **Study Cohort (95% CI) 3-year survival** | **Difference from baseline** | **Matched Cohort 3-year survival** | **Difference from baseline** | | --- | --- | --- | --- | --- | | 2007 – 2009 | 80.5% (80.0% - 81.0%) | Baseline | 97.9% | Baseline | | 2010 - 2012 | 80.1% (79.7% - 80.5% | -0.4% | 98.0% | +0.1% | | 2013 - 2015 | 81.0% (80.6% - 81.4%) | +0.5% | 98.1% | +0.2% | |
| Follow-up is only 3-years post hospital discharge to allow comparison between each year period. Three-year period groups were created to facilitate simple comparisons. |
